# Supplementary material for: Aluminum methylamidoborane complexes: mechanochemical synthesis, structure, stability, and reactive hydride composites
Source: Royal Society of Chemistry journal article supplement (doi:10.1039/d2se01558g), 2023-01-01
Supplement: d2se01558g1.pdf [file d2se01558g1.pdf]

# Aluminum methylamidoborane complexes: mechanochemical synthesis, structure, stability and reactive hydride composites

Ting Zhang, Timothy Steenhaut, Xiao Li, François Devred, Michel Devillers \*, and Yaroslav Filinchuk \*

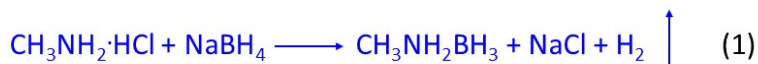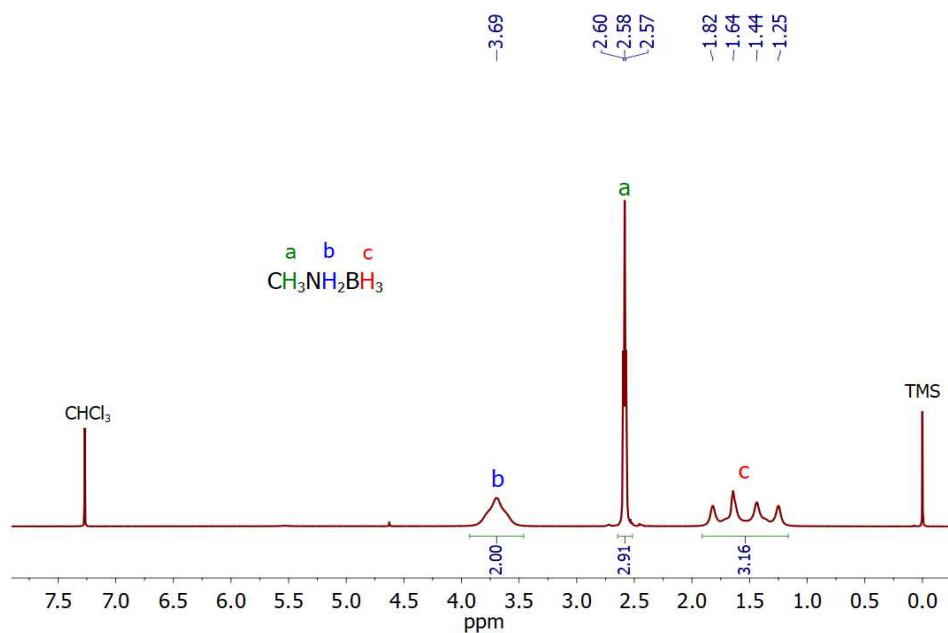

Fig. S1 <sup>1</sup>H NMR spectrum of CH<sub>3</sub>NH<sub>2</sub>BH<sub>3</sub>

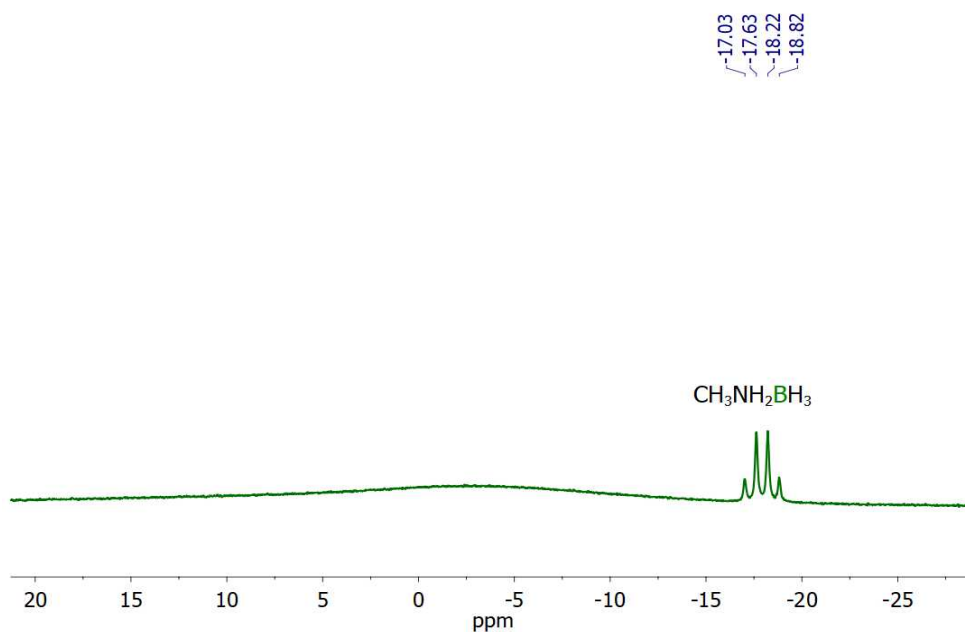

Fig. S2 <sup>11</sup>B NMR spectrum of CH<sub>3</sub>NH<sub>2</sub>BH<sub>3</sub>

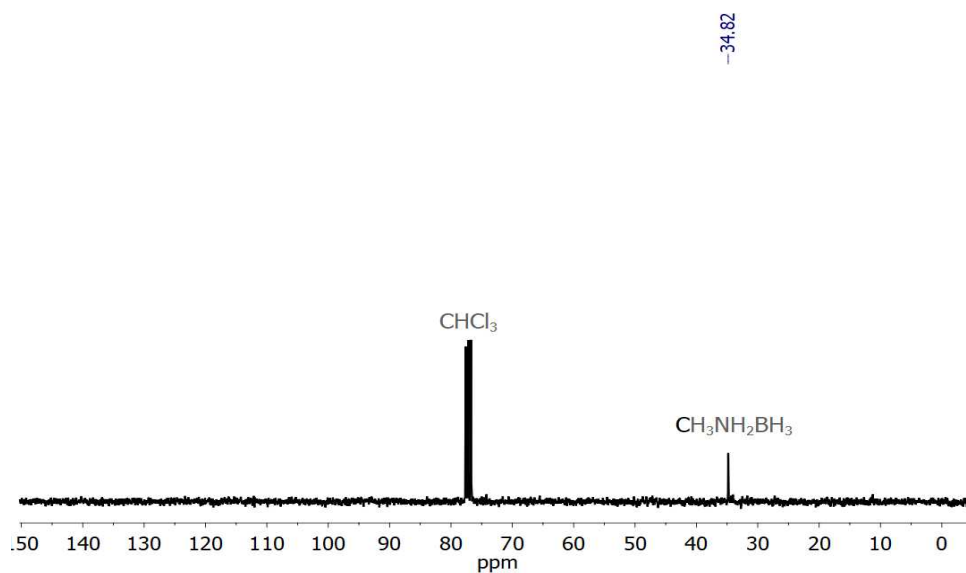

Fig. S3  $^{13}\text{C}$  NMR spectrum of  $\text{CH}_3\text{NH}_2\text{BH}_3$

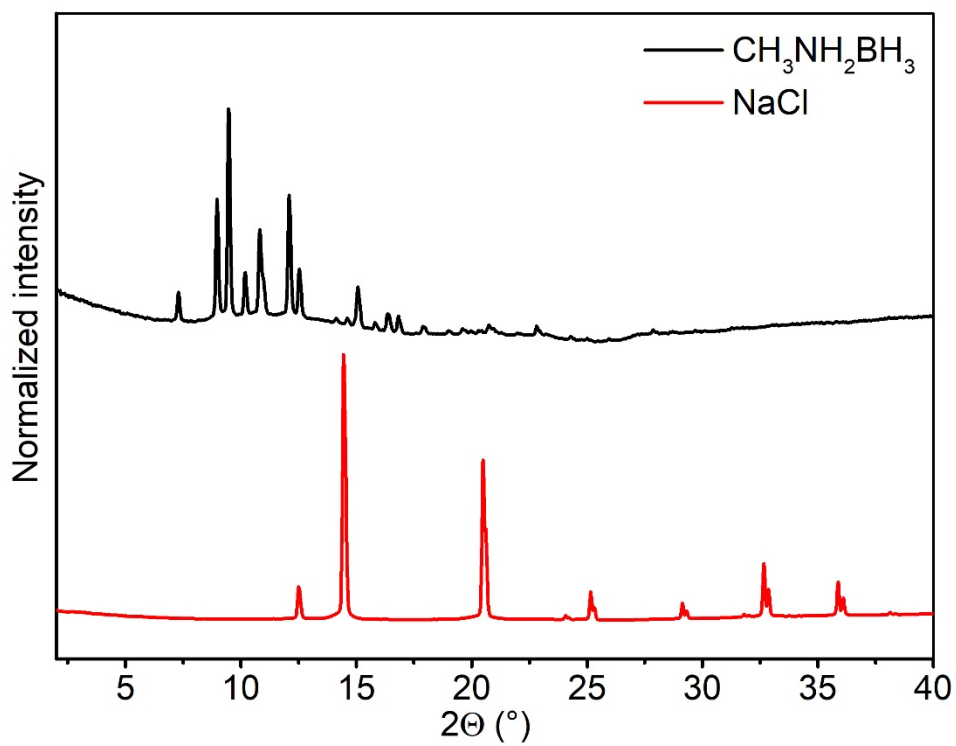

Fig. S4 PXRD pattern of  $\text{CH}_3\text{NH}_2\text{BH}_3$  and  $\text{NaCl}$

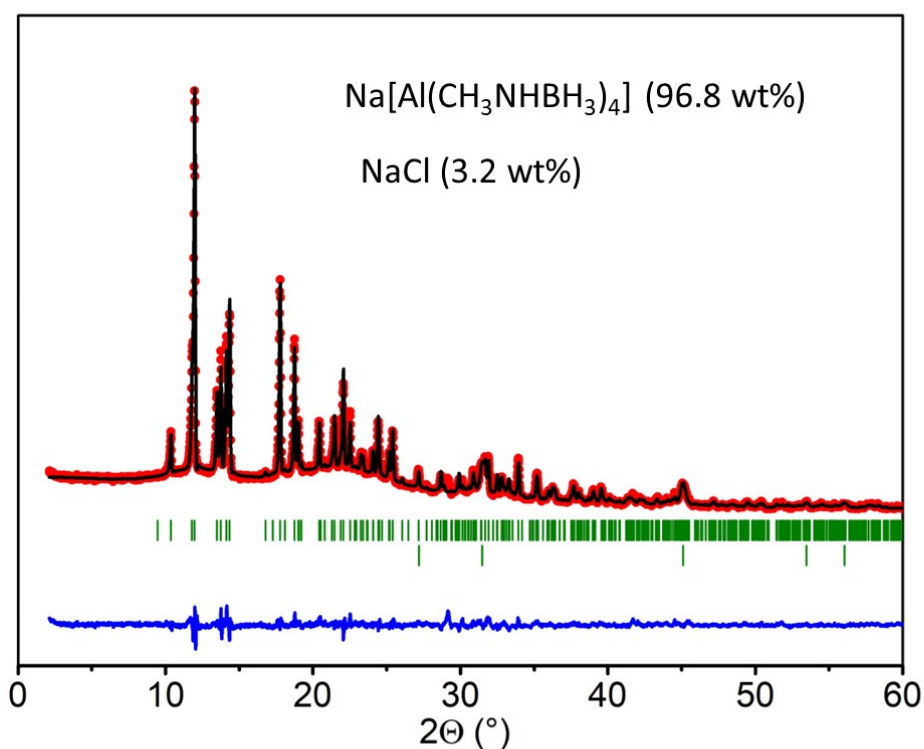

**Fig. S5** Rietveld refinement of the HR-PXRD diffractogram of NaAlH<sub>4</sub>- 4 CH<sub>3</sub>NH<sub>2</sub>BH<sub>3</sub> containing Na[Al(CH<sub>3</sub>NHBH<sub>3</sub>)<sub>4</sub>] (upper green marker), NaCl (lower green marker) ( $\lambda = 1.54056 \text{ \AA}$ ). Observed data ( $Y_{\text{obs}}$ , red curve), Rietveld refinement profile ( $Y_{\text{calc}}$ , black curve), and difference plot ( $Y_{\text{obs}} - Y_{\text{calc}}$ , blue curve). Agreement factors, corrected for background, are  $R_{\text{exp}} = 9.41 \%$ ,  $R_{\text{wp}} = 16.3 \%$ ,  $R_p = 18.8\%$ ,  $\chi^2 = 3$ .

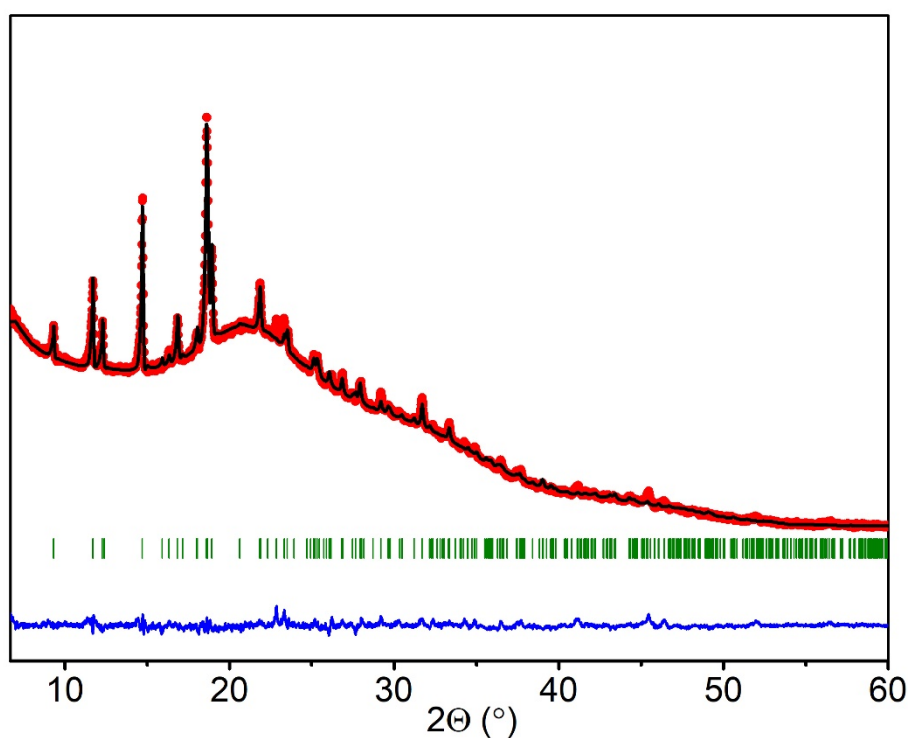

**Fig. S6** Rietveld refinement of the HR-PXRD diffractogram of Na[AlH(CH<sub>3</sub>NHBH<sub>3</sub>)<sub>3</sub>] ( $\lambda = 1.54056 \text{ \AA}$ ). Observed data ( $Y_{\text{obs}}$ , red curve), Rietveld refinement profile ( $Y_{\text{calc}}$ , black curve), and difference plot ( $Y_{\text{obs}} - Y_{\text{calc}}$ , blue curve). Agreement factors, corrected for background, are  $R_{\text{exp}} = 11.92 \%$ ,  $R_{\text{wp}} = 22.4 \%$ ,  $R_p = 38.3 \%$ ,  $\chi^2 = 3.52$ .

**Table S1.** Parameters used for the optimization of the synthesis of  $\text{Na}[\text{Al}(\text{CH}_3\text{NHBH}_3)_4]$ 

| Approach | Rotation speed (rpm) | Milling time(min) | Break time(min) | Number of cycles | Ball to powder mass ratio |
|----------|----------------------|-------------------|-----------------|------------------|---------------------------|
| A        | 600                  | 3                 | 5               | $\geq 90$        | 60:1                      |
| B        | 600                  | 3                 | 5               | 120              | 30:1                      |
| C        | 500                  | 3                 | 2               | 200              | 60:1                      |
| D        | 250                  | 3                 | 2               | 240              | 60:1                      |

**Table S2.** Milling conditions reported for the synthesis of  $\text{Na}[\text{Al}(\text{NH}_2\text{BH}_3)_4]$  and used for the synthesis of the new  $\text{Na}[\text{Al}(\text{CH}_3\text{NHBH}_3)_4]$  complex

| Complex                                            | Rotation speed (rpm) | Milling time(min) | Break time(min) | Number of cycles | Ball to powder mass ratio |
|----------------------------------------------------|----------------------|-------------------|-----------------|------------------|---------------------------|
| $\text{Na}[\text{Al}(\text{NH}_2\text{BH}_3)_4]$   | 600                  | 3                 | 5               | 240              | 30:1                      |
| $\text{Na}[\text{Al}(\text{CH}_3\text{NHBH}_3)_4]$ | 600                  | 3                 | 5               | 120              | 30:1                      |

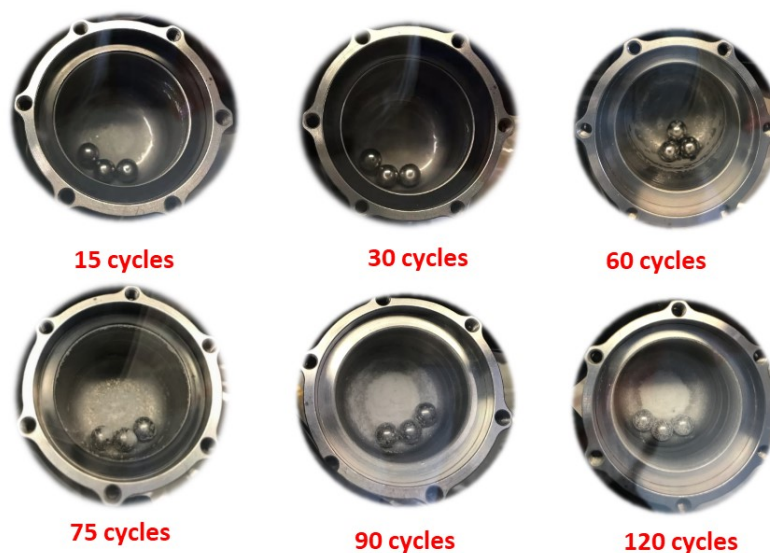**Fig. S7** Photographs of product after different amounts of milling cycles based on Approach A.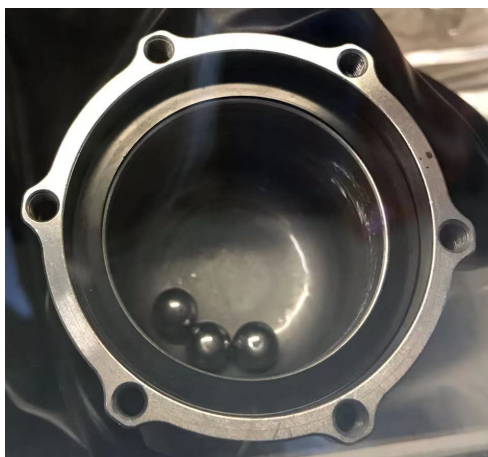**Fig. S8** Photograph of sample used for isolating the  $\text{Na}[\text{AlH}(\text{CH}_3\text{NHBH}_3)_3]$  intermediate after 15 cycles of

milling before drying.

**Table S3.** N-H<sup>δ+</sup>...H<sup>δ-</sup>-B bond lengths and N-H...H angles in Na[Al(NH<sub>2</sub>BH<sub>3</sub>)<sub>4</sub>], Na[AlH(CH<sub>3</sub>NHBH<sub>3</sub>)<sub>3</sub>] and Na[Al(CH<sub>3</sub>NHBH<sub>3</sub>)<sub>4</sub>] complexes.

| Complex                                                   | N-H <sup>δ+</sup> ...H <sup>δ-</sup> -B | D(H...H)/Å | ∠(N-H...H)/° |
|-----------------------------------------------------------|-----------------------------------------|------------|--------------|
| Na[Al(NH <sub>2</sub> BH <sub>3</sub> ) <sub>4</sub> ]    | N(1)-H(11) ...H(15)-B(1)                | 2.06       | 169.0        |
|                                                           | N(1)-H(12) ...H(25)-B(2)                | 2.18       | 134.4        |
|                                                           | N(2)-H(22) ...H(13)-B(1)                | 2.16       | 139.3        |
|                                                           | N(3)-H(31) ...H(35)-B(3)                | 2.24       | 137.2        |
|                                                           | N(3)-H(32) ...H(15)-B(1)                | 2.28       | 157.6        |
|                                                           | N(4)-H(41) ...H(23)-B(2)                | 1.96       | 143.9        |
|                                                           | N(4)-H(42) ...H(45)-B(4)                | 2.00       | 162.1        |
| Na[AlH(CH <sub>3</sub> NHBH <sub>3</sub> ) <sub>3</sub> ] | N(31)-H(31) ...H(01)-Al(1)              | 2.43       | 139.6        |
| Na[Al(CH <sub>3</sub> NHBH <sub>3</sub> ) <sub>4</sub> ]  | N(21)-H(21) ...H(44)-B(41)              | 2.09       | 149.2        |
|                                                           | N(31)-H(31) ...H(14)-B(11)              | 2.34       | 160.4        |
|                                                           | N(41)-H(41) ...H(33)-B(31)              | 2.15       | 141.5        |
|                                                           | N(41)-H(41) ...H(32)-B(31)              | 2.21       | 142.3        |

**Table S4.** B-N bond lengths in CH<sub>3</sub>NH<sub>2</sub>BH<sub>3</sub>, Na[AlH(CH<sub>3</sub>NHBH<sub>3</sub>)<sub>3</sub>] and Na[Al(CH<sub>3</sub>NHBH<sub>3</sub>)<sub>4</sub>]

|                  | CH <sub>3</sub> NH <sub>2</sub> BH <sub>3</sub> | Na[AlH(CH <sub>3</sub> NHBH <sub>3</sub> ) <sub>3</sub> ] | Na[Al(CH <sub>3</sub> NHBH <sub>3</sub> ) <sub>4</sub> ] |
|------------------|-------------------------------------------------|-----------------------------------------------------------|----------------------------------------------------------|
| N-B(bond length) | 1.58(7)                                         | 1.46(3)                                                   | 1.57(1)                                                  |
|                  |                                                 | 1.54(2)                                                   | 1.54(7)                                                  |
|                  |                                                 | 1.47(3)                                                   | 1.52(7)                                                  |
|                  |                                                 |                                                           | 1.57(0)                                                  |

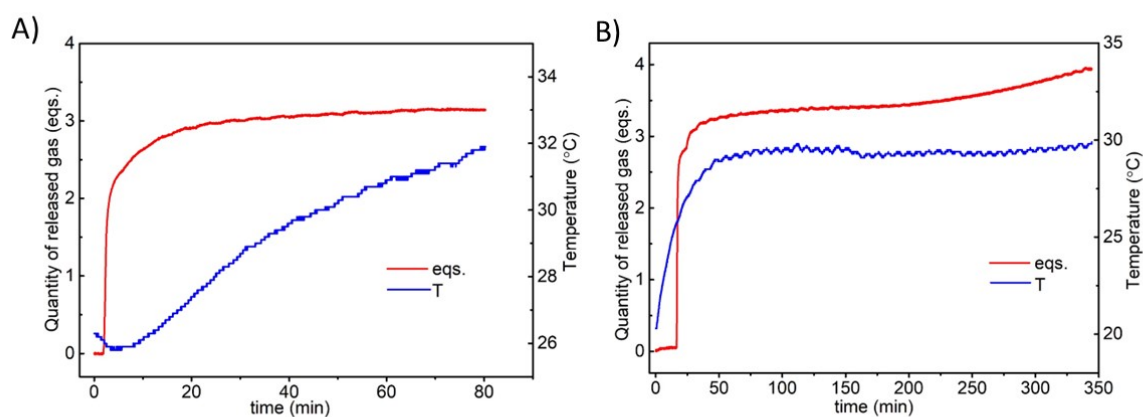

**Fig. S9** The quantity of gas per Al released and temperature during the synthesis of Na[AlH(CH<sub>3</sub>NHBH<sub>3</sub>)<sub>3</sub>] (A) and Na[Al(CH<sub>3</sub>NHBH<sub>3</sub>)<sub>4</sub>] (B).

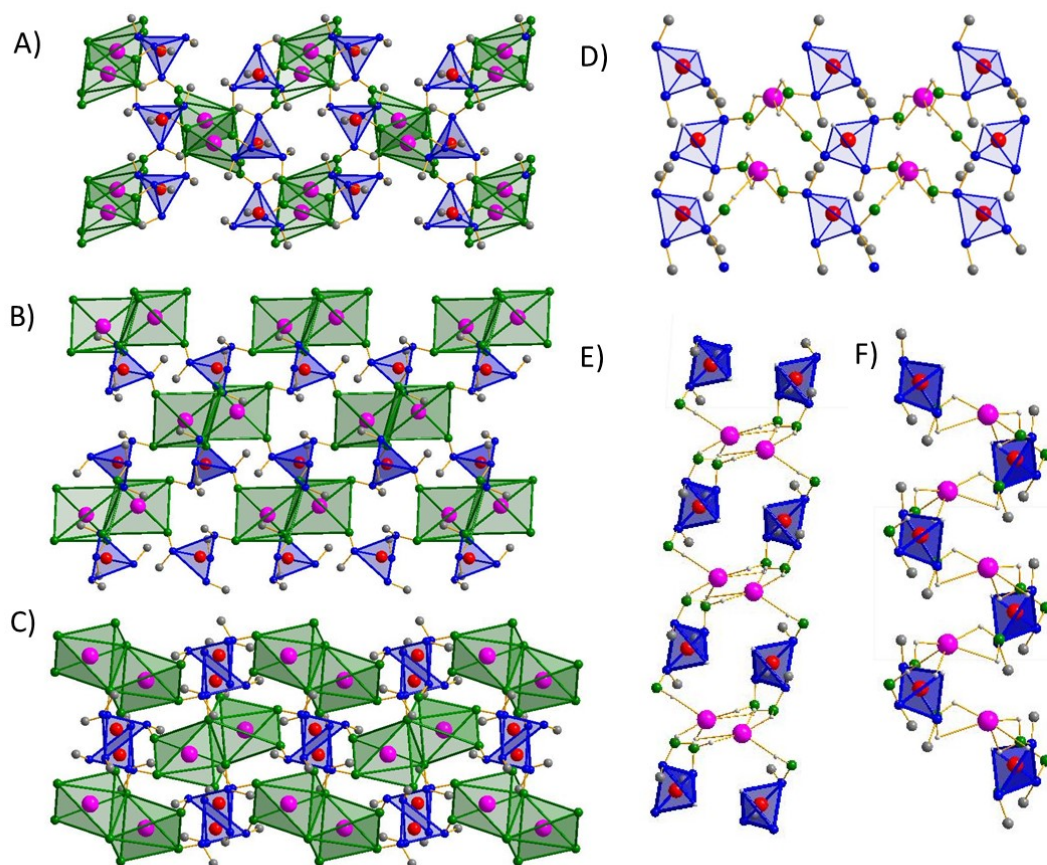

**Fig. S10.** Crystal packing of Al and Na coordination polyhedra in the structure of  $\text{Na}[\text{Al}(\text{CH}_3\text{NHBH}_3)_4]$  and  $\text{Na}[\text{AlH}(\text{CH}_3\text{NHBH}_3)_3]$  along the a (A,D), b (B,E), and c (C,F) axis. Color code: N = blue, B = green, C = grey, H = light grey, Al = red, and Na = pink. Hydrogen atoms are omitted for clarity.

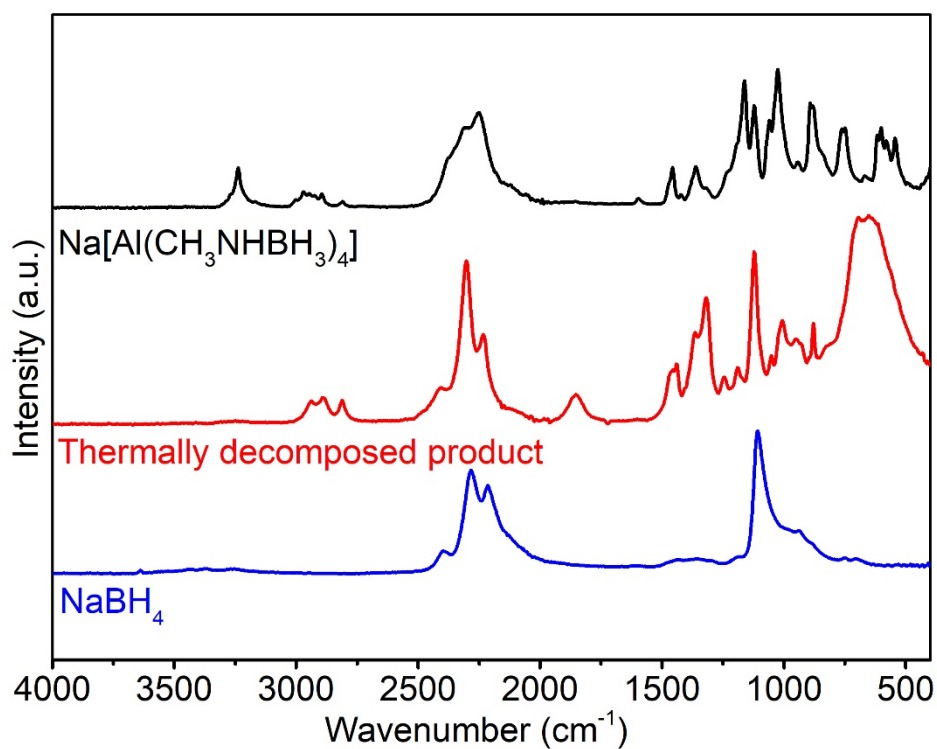

**Fig. S11.** ATR-IR spectra of  $\text{Na}[\text{Al}(\text{CH}_3\text{NHBH}_3)_4]$ ,  $\text{NaBH}_4$ , and the residue obtained upon heating  $\text{Na}[\text{Al}(\text{CH}_3\text{NHBH}_3)_4]$  at  $100^\circ\text{C}$ .

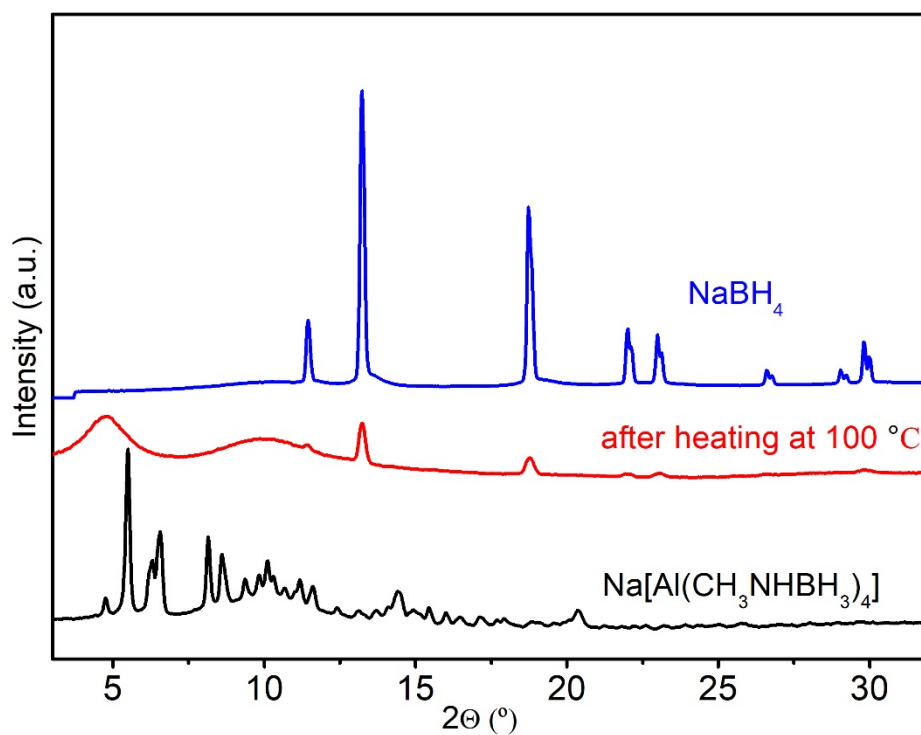

**Fig. S12.** PXR D patterns of  $\text{Na[Al(CH}_3\text{NHBH}_3)_4]$ ,  $\text{NaBH}_4$ , and the residue obtained upon heating  $\text{Na[Al(CH}_3\text{NHBH}_3)_4]$  at  $100^\circ\text{C}$ .

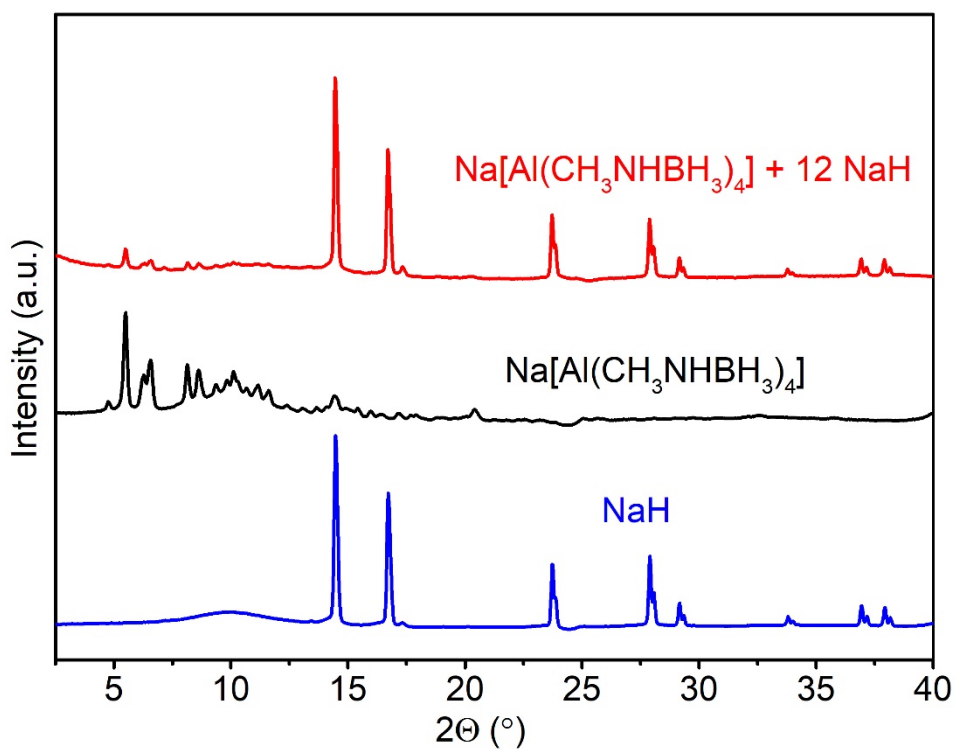

**Fig. S13** PXR D patterns of  $\text{Na[Al(CH}_3\text{NHBH}_3)_4] + 12 \text{ NaH}$ ,  $\text{Na[Al(CH}_3\text{NHBH}_3)_4]$ , and commercial  $\text{NaH}$ .

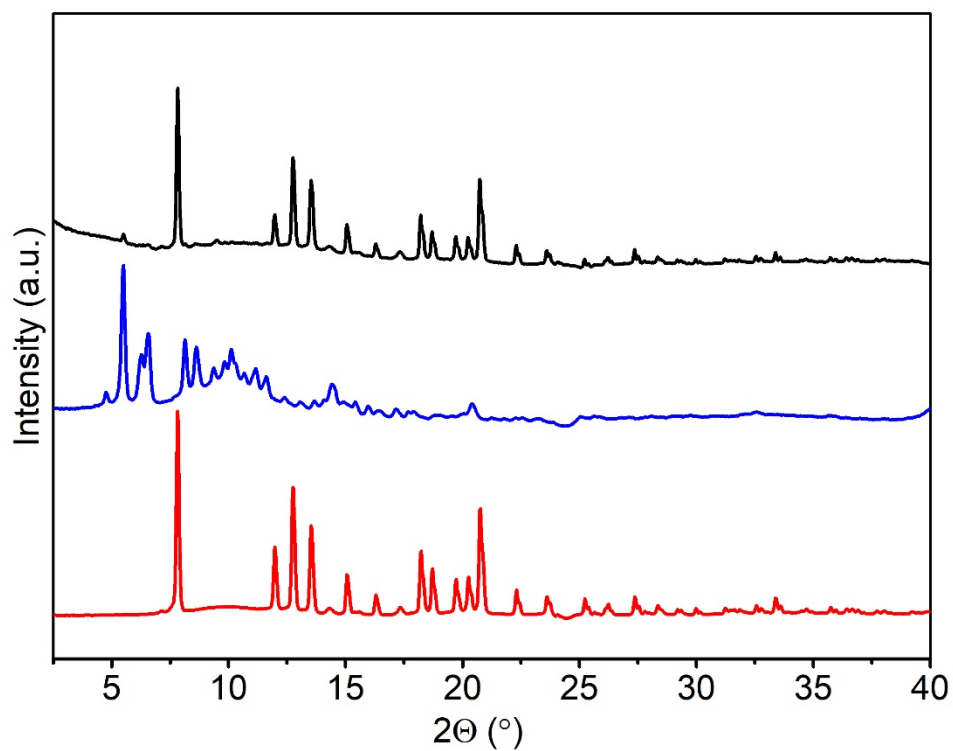

**Fig. S14** PXRD patterns of  $\text{Na}[\text{Al}(\text{CH}_3\text{NHBH}_3)_4] + 6 \text{NaNH}_2$ ,  $\text{Na}[\text{Al}(\text{CH}_3\text{NHBH}_3)_4]$ , and commercial  $\text{NaNH}_2$ .

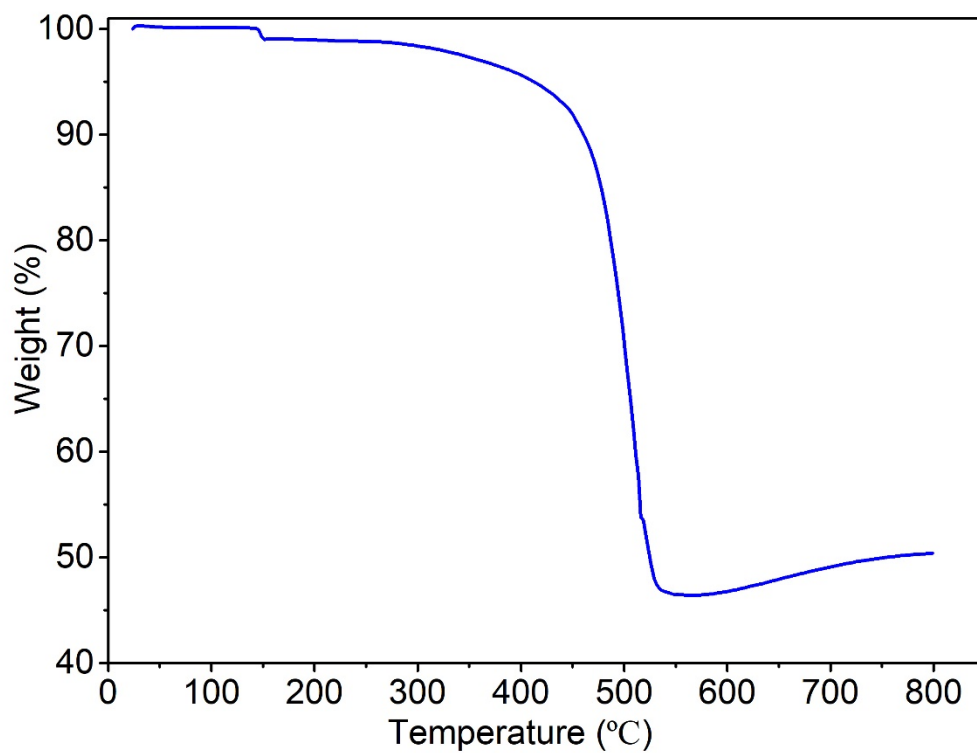

**Figure S15.** TGA curve of commercial  $\text{NaNH}_2$ .



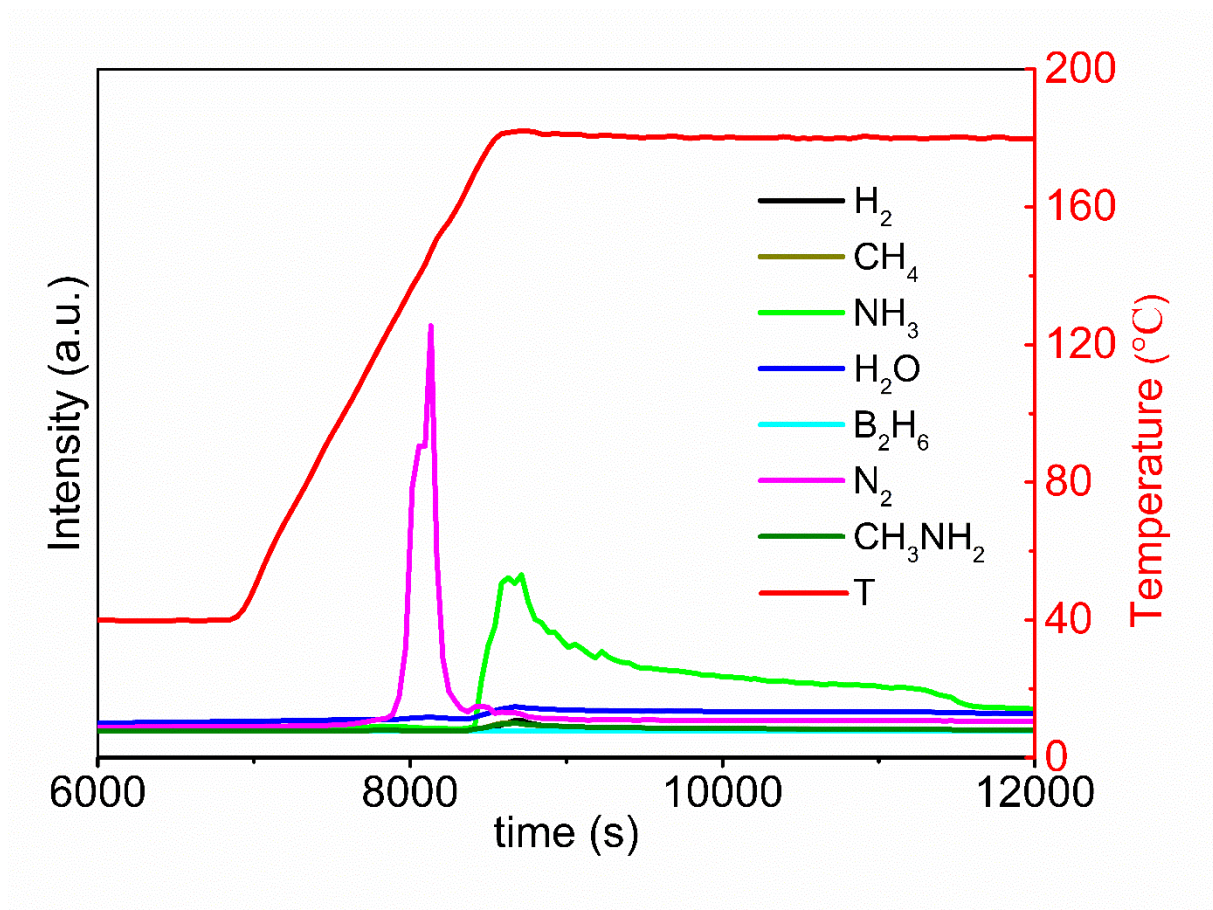

Fig. S16. MS spectra of commercial  $\text{NaNH}_2$  corresponding to time.

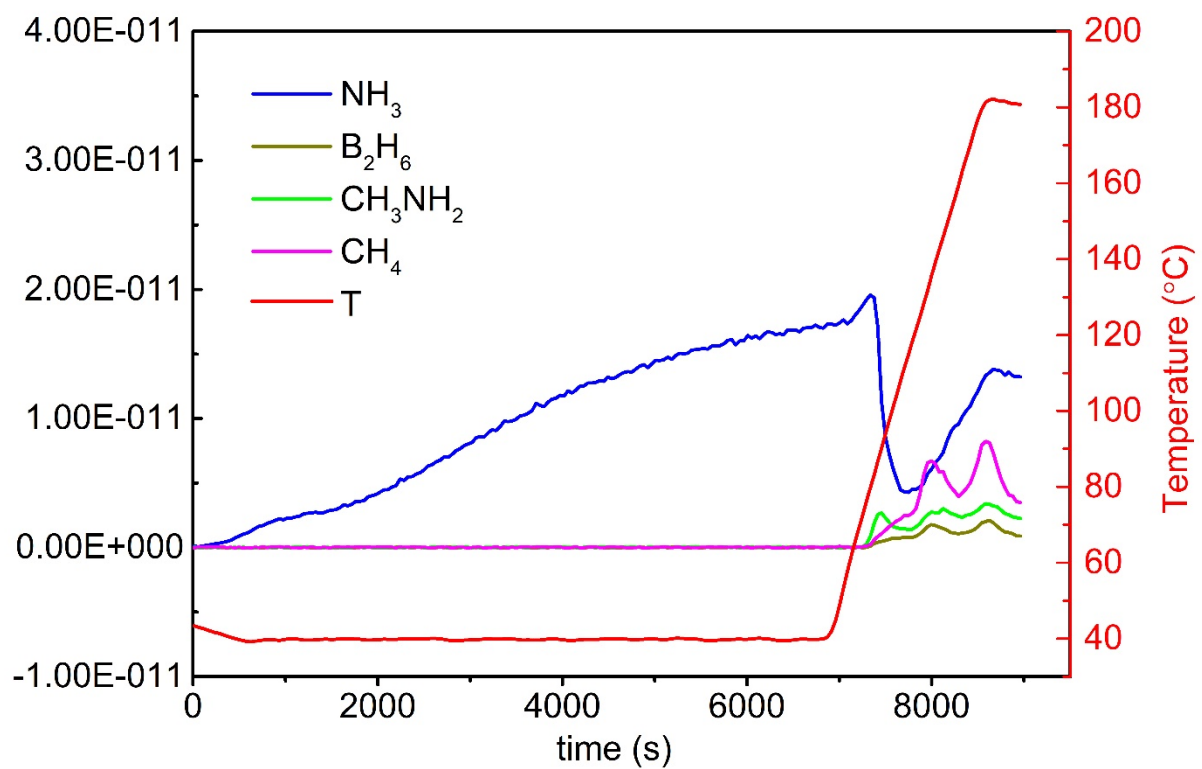

Fig. S17 Zoomed in the non- $\text{H}_2$  MS curve of  $\text{Na}[\text{Al}(\text{CH}_3\text{NHBH}_3)_4] + 12 \text{NaH}$

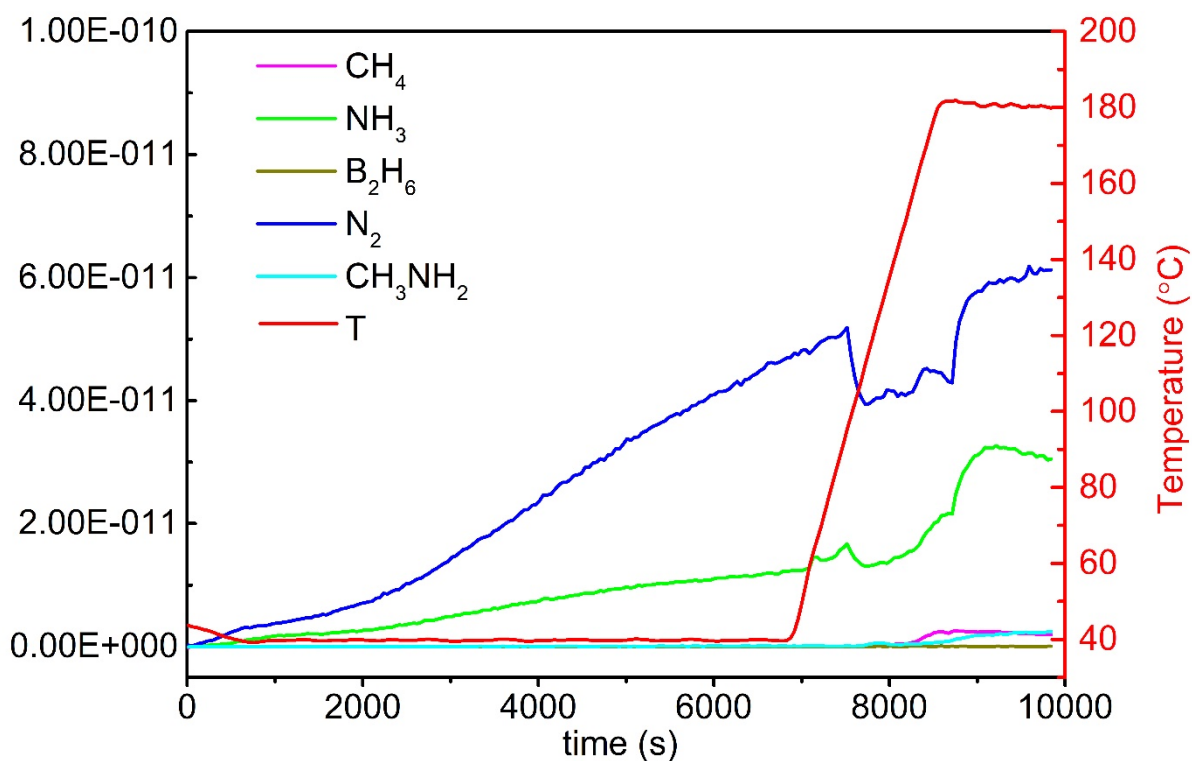

Fig. S18 Zoomed in the non-H<sub>2</sub> MS curve of Na[Al(CH<sub>3</sub>NHBH<sub>3</sub>)<sub>4</sub>] + 6 NaNH<sub>2</sub>

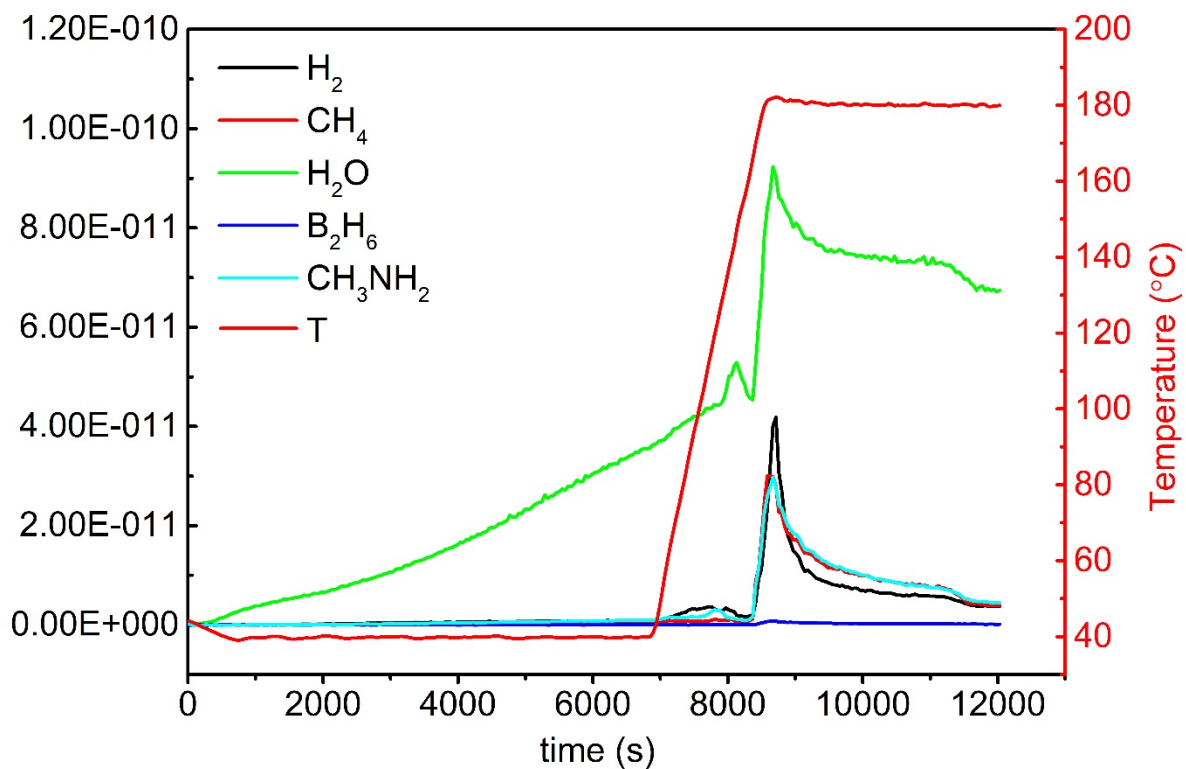

Fig. S19 Zoomed in the non-N<sub>2</sub> and NH<sub>3</sub> MS curve of commercial NaNH<sub>2</sub>

**Table S5.** The molar mass, density, the molar volume and hydrogen densities of Na[Al(CH<sub>3</sub>NHBH<sub>3</sub>)<sub>4</sub>], NaH and NaNH<sub>2</sub> and their composites.

| Compound                                                                          | M (g/mole) | $\delta$ (g/cm <sup>3</sup> ) | V (cm <sup>3</sup> ) | Gravimetric density (%) | Volumetric density (g/l) |
|-----------------------------------------------------------------------------------|------------|-------------------------------|----------------------|-------------------------|--------------------------|
| Na[Al(CH <sub>3</sub> NHBH <sub>3</sub> ) <sub>4</sub> ]                          | 225.5      | 1.014                         | 222.4                | 12.42                   | 126                      |
| NaH                                                                               | 24         | 1.47                          | 16.3                 | 4.17                    | 61                       |
| NaNH <sub>2</sub>                                                                 | 39         | 1.39                          | 28.1                 | 5.13                    | 71                       |
| Na[Al(CH <sub>3</sub> NHBH <sub>3</sub> ) <sub>4</sub> ]<br>+ 12 NaH              | 513.5      | -                             | 418.3                | 7.79                    | 96                       |
| Na[Al(CH <sub>3</sub> NHBH <sub>3</sub> ) <sub>4</sub> ]<br>+ 6 NaNH <sub>2</sub> | 459.5      | -                             | 390.7                | 8.70                    | 102                      |
